# Supplementary material for: Risk of stomach cancer in Aotearoa/New Zealand: A Māori population based case-control study
Source: PLOS journal article supplement (doi:10.1371/journal.pone.0181581), 2017-07-21
Supplement: S1 (10.1371/journal.pone.0181581.s001) [file journal.pone.0181581.s001]

**Stomach Cancer**  
**Study questionnaire**

## SECTION A: ABOUT YOU

***In this first section, please tell us a few details about yourself***

- 1) Before you start, please fill in today's date.
 

Day

Month

Year
  
- 2) What is your date of birth?
 

Day

Month

Year
  
- 3) **Were you born** in New Zealand?
 

Yes

No

Don't know
  
- 4) If you were not born in New Zealand, please tell us what age you were when you came to New Zealand
  
- 5) Which ethnic group do you belong to?  
*Tick the box or boxes which apply to you*

|                        |   |                                                                                      |
|------------------------|---|--------------------------------------------------------------------------------------|
| New Zealand European   | 1 | <input style="width: 40px; height: 25px; border: 1px solid black;" type="checkbox"/> |
| Māori                  | 2 | <input style="width: 40px; height: 25px; border: 1px solid black;" type="checkbox"/> |
| Samoaan                | 3 | <input style="width: 40px; height: 25px; border: 1px solid black;" type="checkbox"/> |
| Cook Island Māori      | 4 | <input style="width: 40px; height: 25px; border: 1px solid black;" type="checkbox"/> |
| Tongan                 | 5 | <input style="width: 40px; height: 25px; border: 1px solid black;" type="checkbox"/> |
| Niuean                 | 6 | <input style="width: 40px; height: 25px; border: 1px solid black;" type="checkbox"/> |
| Chinese                | 7 | <input style="width: 40px; height: 25px; border: 1px solid black;" type="checkbox"/> |
| Indian                 | 8 | <input style="width: 40px; height: 25px; border: 1px solid black;" type="checkbox"/> |
| Other (please specify) | 9 | <input style="width: 40px; height: 25px; border: 1px solid black;" type="checkbox"/> |

.....

## SECTION B: ABOUT YOUR CHILDHOOD

***We would like to get an idea of what your childhood was like. Please try to think back to what your life was like when you were at primary school. Do not worry if you cannot remember exactly.***

Think about the house you lived in for the longest part of your childhood

6) How many rooms were there in that house?  
*Please exclude the hall, landing, kitchen, laundry / washroom, bathroom(s) and toilet(s)*  Rooms

7) How many people lived in that house?  People

8) When you were **a child**, was either parent unemployed for any period of time?

*Do not include working at home or housework as unemployment*

Yes  No  I do not know

1

2

3

9) When you were **a child**, did anyone in your household smoke?

Yes No Don't know

10) When you were **a child**, how regularly did you eat fruit?

1

Every day

2

5 to 6 days per week

3

1 to 4 days per week

4

Less than once a week

11) When you were **a child**, how regularly did you eat vegetables (excluding potatoes)?

1

Every day

2

5 to 6 days per week

3

1 to 4 days per week

4

Less than once a week

- 12) Did your parents own or partly own their home (with or without a mortgage)  
 Yes ☐ No ☐ I do not know ☐  
 1 2
- 13) Did your parents own a car  
 Yes ☐ No ☐ I do not know ☐  
 1 2
- 14) Did your parents have a telephone in their house  
 Yes ☐ No ☐ I do not know ☐  
 1 2

### SECTION C: ABOUT YOUR MOTHER

*This section is about your mother.  
 Please answer the questions in relation to your biological mother.*

- 15) Do you know, or know of, **your biological mother**? Yes ☐ No ☐  
 1 2

If **No**, go to **Section D**

If **Yes**,

- 16) What was your **mother's** date of birth?     
 Day Month Year

*If you only know the year, or month and year, please enter these*

 

- 17) Did (does) your **mother** suffer from any of the following conditions?  
 Please tick either "**Yes**" or "**No**" for each condition

- |                                         |                              |                             |
|-----------------------------------------|------------------------------|-----------------------------|
| i. Stomach cancer                       | Yes <input type="checkbox"/> | No <input type="checkbox"/> |
| ii. Breast Cancer                       | Yes <input type="checkbox"/> | No <input type="checkbox"/> |
| iii. Bowel / Colon Cancer               | Yes <input type="checkbox"/> | No <input type="checkbox"/> |
| iv. Ovarian Cancer                      | Yes <input type="checkbox"/> | No <input type="checkbox"/> |
| v. Lung Cancer                          | Yes <input type="checkbox"/> | No <input type="checkbox"/> |
| vi. Other Cancer (please specify below) | Yes <input type="checkbox"/> | No <input type="checkbox"/> |

18) Which other cancer did (does) she have?

.....

#### SECTION D: ABOUT YOUR FATHER

*This section is about your father.  
Please answer the questions in relation to your **biological** father.*

19) Do you know, or know of, your **biological father**?

Yes ☐<sub>1</sub> No ☐<sub>2</sub>

If **No**, go to **Section E**

If **Yes**,

20) What was your **father's** date of birth?

<sub>Day</sub> <sub>Month</sub> <sub>Year</sub>

*If you only know the year, or month and year, please enter these*

<sub>Year</sub> <sub>Month and Year</sub>

21) Did (does) your **father** suffer from any of the following conditions?

*Please tick either "Yes" or "No" for **each** condition*

i. Stomach cancer

Yes ☐<sub>1</sub> No ☐<sub>2</sub>

ii. Lung Cancer

Yes ☐<sub>1</sub> No ☐<sub>2</sub>

iii. Bowel / Colon Cancer

Yes ☐<sub>1</sub> No ☐<sub>2</sub>

iv. Prostate Cancer

Yes ☐<sub>1</sub> No ☐<sub>2</sub>

v. Other Cancer (please specify below)

Yes ☐<sub>1</sub> No ☐<sub>2</sub>

22) Which other cancer did (does) he have?

.....

## SECTION E: ABOUT YOUR BROTHERS AND SISTERS

***In this section, we are interested in your brothers and sisters (siblings). In each of the following questions, please refer only to full siblings, i.e. those that have the same mother and father as you. Do not include half brothers or sisters, or adopted siblings.***

- 23)** How many **full brothers and sisters** do (did) you have?

*If none, please enter "0" and go to **Section F**.*

*If any have died, please include them in this count.*



i) Brothers

ii) Sisters

- 24)** How many **older** full brothers and sisters do (did) you have?

*If you are the oldest, answer "0"*

*If you have one older brother/sister, answer "1" etc.*

*If you are one of a twin, please do not count your twin as older than you.*

*If you have older twin brothers/sisters, please count them separately.*



i) Brothers

ii) Sisters

- 25)** Have any of your full brothers or sisters been diagnosed with any of the following conditions?

*Please enter "0" if none of your siblings have had a particular condition.*

*If one sibling has had more than one condition, they may be counted more than once.*

| Condition               | Number of<br>Brothers with<br>Condition<br><small>A</small> | Number of<br>Sisters with<br>Condition<br><small>B</small> |
|-------------------------|-------------------------------------------------------------|------------------------------------------------------------|
| i. Stomach cancer       |                                                             |                                                            |
| ii. Lung Cancer         |                                                             |                                                            |
| iii. Breast Cancer      |                                                             |                                                            |
| iv. Prostate Cancer     |                                                             | N/A                                                        |
| v. Bowel / Colon Cancer |                                                             |                                                            |
| vi. Other Cancer        |                                                             |                                                            |

**Please complete each box, with "0" or other appropriate number**

## SECTION F: YOUR LIFE-STYLE

***In this section, we are interested in your life and life-style  
Please answer the questions in reference to your life one year ago***

- 26)** In an average week **last year**, how many times a week did you exercise long enough to work up a sweat or so your heart beats rapidly?

Please tick **one** box only

None ☐ 1-2 a week ☐ 3-4 a week ☐ 5+ a week ☐

1 2 3 4

- 27)** How many servings of **vegetables** (excluding potatoes) did you usually eat each week?  Servings

**As a guide:** a serving of vegetables is one handful OR 1/2 cup raw OR cooked OR 80g cooked

- 28)** How many servings of **fruit** did you usually eat each week?  Servings

**As a guide:** 1/2 cup cooked or raw fruit OR 120g OR one medium sized apple, pear or orange etc OR two smaller fruits e.g. plums, kiwifruit, feijoas etc

- 29)** In an average week **last year**, how many times a week did you eat **red** meat? (e.g. beef, lamb. Include mince, meat in pies etc)

Please tick **one** box only

None ☐ 1-2 a week ☐ 3-4 a week ☐ 5+ a week ☐

1 2 3 4

- 30)** In an average week **last year**, how many times a week did you eat **white** meat? (e.g. chicken, pork. Include mince, meat in pies etc)

Please tick **one** box only

None ☐ 1-2 a week ☐ 3-4 a week ☐ 5+ a week ☐

1 2 3 4

- 31)** In an average week **last year**, how many times a week did you eat **fish**? (Include shellfish)

Please tick **one** box only

None ☐ 1-2 a week ☐ 3-4 a week ☐ 5+ a week ☐

1 2 3 4

- 32) In an average week **last year**, how many times a week did you eat **dried or salted food**? (hams, bacon, salami)

Please tick **one** box only

None ☐ 1-2 a week ☐ 3-4 a week ☐ 5+ a week ☐

1 2 3 4

### SMOKING

- 33) During your adult life, has anyone you live with ever smoked regularly? Yes ☐ No ☐
- 1 2

- 34) Have you **ever** smoked, now or in the past? Yes ☐ No ☐
- 1 2

- 35) What **age** were you when you started smoking regularly?  Years
- If **No**, go to **Question 42**

- 36) Are you a **current** smoker? Yes ☐ No ☐
- 1 2

If **No**, go to **Question 40**

### CURRENT SMOKERS ONLY

- 37) If **Yes**, on average, how many cigarettes do you smoke in a day?  
Please tick **one** box only

Under 10 a day ☐ 10 to 19 a day ☐ 20 or more a day ☐

4 2 3

### PAST SMOKERS ONLY

- 38) On average, how many cigarettes did you used to smoke in a day?  
Please tick **one** box only

Under 10 a day ☐ 10 to 19 a day ☐ 20 or more a day ☐

4 2 3

- 39) How old were you when you STOPPED smoking?  Years



## ALCOHOL

The following questions are about drinking alcohol. As a guide, a drink is: a can or small bottle of beer (a third of a pub jug) OR a small glass of wine OR a nip of spirits (a 'single' in a pub)

**40) On average last year, how often did you have a drink containing alcohol?**

Please tick **one** box only

- |                            |                            |                            |                            |                            |
|----------------------------|----------------------------|----------------------------|----------------------------|----------------------------|
| 1 <input type="checkbox"/> | 2 <input type="checkbox"/> | 3 <input type="checkbox"/> | 4 <input type="checkbox"/> | 5 <input type="checkbox"/> |
| Never                      | Monthly or less            | 2 to 4 times a month       | 2 to 3 times a week        | 4 or more times a week     |

**41) On average last year, how many drinks containing alcohol did you have on a typical day when you are drinking?**

Please tick **one** box only

- |                            |                            |                            |                            |                            |
|----------------------------|----------------------------|----------------------------|----------------------------|----------------------------|
| 1 <input type="checkbox"/> | 2 <input type="checkbox"/> | 3 <input type="checkbox"/> | 4 <input type="checkbox"/> | 5 <input type="checkbox"/> |
| 1 or 2                     | 3 or 4                     | 5 or 6                     | 7 to 9                     | 10 or more                 |

**42) What age were you when you started drinking alcohol regularly?**

Years

## SECTION G: YOUR EARLIER LIFE-STYLE

***We are interested in your life-style when you were younger. Please answer the questions in reference to your life at ages 20 years and 40 years. If you are younger than 40, please leave these boxes blank.***

### WHEN YOU WERE 20 YEARS OLD:

**43)** How often did you have a drink containing alcohol? Please tick one box

- |                                                               |                                                               |                                                               |                                                               |                                                               |
|---------------------------------------------------------------|---------------------------------------------------------------|---------------------------------------------------------------|---------------------------------------------------------------|---------------------------------------------------------------|
| 1 <input style="width: 40px; height: 20px;" type="checkbox"/> | 2 <input style="width: 40px; height: 20px;" type="checkbox"/> | 3 <input style="width: 40px; height: 20px;" type="checkbox"/> | 4 <input style="width: 40px; height: 20px;" type="checkbox"/> | 5 <input style="width: 40px; height: 20px;" type="checkbox"/> |
| Never                                                         | Monthly or<br>less                                            | 2 to 4 times<br>a month                                       | 2 to 3 times a<br>week                                        | 4 or more<br>times a week                                     |

**44)** How many drinks containing alcohol did you have on a typical day when you are drinking? Please tick one box only

- |                                                               |                                                               |                                                               |                                                               |                                                               |
|---------------------------------------------------------------|---------------------------------------------------------------|---------------------------------------------------------------|---------------------------------------------------------------|---------------------------------------------------------------|
| 1 <input style="width: 40px; height: 20px;" type="checkbox"/> | 2 <input style="width: 40px; height: 20px;" type="checkbox"/> | 3 <input style="width: 40px; height: 20px;" type="checkbox"/> | 4 <input style="width: 40px; height: 20px;" type="checkbox"/> | 5 <input style="width: 40px; height: 20px;" type="checkbox"/> |
| 1 or 2                                                        | 3 or 4                                                        | 5 or 6                                                        | 7 to 9                                                        | 10 or more                                                    |

**45)** At the **age of 20**, which of the following best described you? Please tick one box only

- |                                                               |                                                               |                                                               |                                                               |
|---------------------------------------------------------------|---------------------------------------------------------------|---------------------------------------------------------------|---------------------------------------------------------------|
| 1 <input style="width: 40px; height: 20px;" type="checkbox"/> | 2 <input style="width: 40px; height: 20px;" type="checkbox"/> | 3 <input style="width: 40px; height: 20px;" type="checkbox"/> | 4 <input style="width: 40px; height: 20px;" type="checkbox"/> |
| Not at all<br>physically active                               | Not very<br>physically active                                 | Fairly<br>physically active                                   | Very<br>physically active                                     |

### WHEN YOU WERE 40 YEARS OLD:

**46)** How often did you have a drink containing alcohol? Please tick one box

- |                                                               |                                                               |                                                               |                                                               |                                                               |
|---------------------------------------------------------------|---------------------------------------------------------------|---------------------------------------------------------------|---------------------------------------------------------------|---------------------------------------------------------------|
| 1 <input style="width: 40px; height: 20px;" type="checkbox"/> | 2 <input style="width: 40px; height: 20px;" type="checkbox"/> | 3 <input style="width: 40px; height: 20px;" type="checkbox"/> | 4 <input style="width: 40px; height: 20px;" type="checkbox"/> | 5 <input style="width: 40px; height: 20px;" type="checkbox"/> |
| Never                                                         | Monthly or<br>less                                            | 2 to 4 times<br>a month                                       | 2 to 3 times a<br>week                                        | 4 or more<br>times a week                                     |

**47)** How many drinks containing alcohol did you have on a typical day when you are drinking? Please tick one box only

- |                                                               |                                                               |                                                               |                                                               |                                                               |
|---------------------------------------------------------------|---------------------------------------------------------------|---------------------------------------------------------------|---------------------------------------------------------------|---------------------------------------------------------------|
| 1 <input style="width: 40px; height: 20px;" type="checkbox"/> | 2 <input style="width: 40px; height: 20px;" type="checkbox"/> | 3 <input style="width: 40px; height: 20px;" type="checkbox"/> | 4 <input style="width: 40px; height: 20px;" type="checkbox"/> | 5 <input style="width: 40px; height: 20px;" type="checkbox"/> |
| 1 or 2                                                        | 3 or 4                                                        | 5 or 6                                                        | 7 to 9                                                        | 10 or more                                                    |

**48)** At the **age of 40**, which of the following best described you? Please tick one box only

- |                                                               |                                                               |                                                               |                                                               |
|---------------------------------------------------------------|---------------------------------------------------------------|---------------------------------------------------------------|---------------------------------------------------------------|
| 1 <input style="width: 40px; height: 20px;" type="checkbox"/> | 2 <input style="width: 40px; height: 20px;" type="checkbox"/> | 3 <input style="width: 40px; height: 20px;" type="checkbox"/> | 4 <input style="width: 40px; height: 20px;" type="checkbox"/> |
| Not at all<br>physically active                               | Not very<br>physically active                                 | Fairly<br>physically active                                   | Very<br>physically active                                     |

## SECTION H: YOUR WORK

- 49)** Please complete the table below with regards to work that you have ever done.  
List **all** the jobs you have held in order from the first job you ever held. Please include paid and unpaid work  
*The first line is an example*

|                | Who was your<br><b>employer?</b><br>(Name and Location) | <b>WHEN</b> did you work for this<br>employer? |         | What was the <b>main activity</b><br>of the organisation? | What was your<br><b>department?</b> | What was your<br><b>job title?</b> |
|----------------|---------------------------------------------------------|------------------------------------------------|---------|-----------------------------------------------------------|-------------------------------------|------------------------------------|
|                |                                                         | FROM                                           | TO      |                                                           |                                     |                                    |
| <b>Example</b> | J.B.Manufacturers,<br>Hamilton                          | 04/1975                                        | 08/1994 | Manufacturing picture frame<br>mouldings                  | Office                              | Administrator                      |
| <b>1.</b>      |                                                         |                                                |         |                                                           |                                     |                                    |
| <b>2.</b>      |                                                         |                                                |         |                                                           |                                     |                                    |
| <b>3.</b>      |                                                         |                                                |         |                                                           |                                     |                                    |
| <b>4.</b>      |                                                         |                                                |         |                                                           |                                     |                                    |
| <b>5.</b>      |                                                         |                                                |         |                                                           |                                     |                                    |
| <b>6.</b>      |                                                         |                                                |         |                                                           |                                     |                                    |

Please use an additional sheet of paper if necessary.

## SECTION I: YOUR HEALTH

- 50) Do you have a health practitioner or service for example, a doctor or nurse or other service that you usually **first** go to see when you are feeling unwell or are injured?

☐

Yes

☐

No

☐

Don't know

What sort of practitioner is this?

My Family Doctor or regular GP

1

☐

The most convenient GP at the time

2

☐

The Accident and Emergency at a public hospital

3

☐

The Accident and Emergency at a private clinic

4

☐

Maori /Pacific health provider

5

☐

Community-based health provider

6

☐

Other *please specify*

7

☐

- 51) What is your height in centimetres or feet/inches?  
(One year ago)

- 52) What is your weight in kilograms or stones/pounds?  
(One year ago)

### DIABETES

- 53) Have you ever been told by a doctor that you have diabetes or sugar in the blood?

Yes

☐

No

☐

<sup>1</sup> If **No**, go to **Question 59** <sup>2</sup>

If Yes,

- 54) In what year was your diabetes first diagnosed?

- 55) In what year did you begin regular treatment (with diet, tablets or injections) for your diabetes?

56) Are you on regular treatment with insulin for your diabetes?

Yes ☐ No ☐  
1 2

57) Are you on regular tablets for your diabetes?

Yes ☐ No ☐  
1 2

If **No**, go to **Question 59**

If **Yes**,

58) Please give the name of medication

.....

## CANCER

59) Have you ever been told by a doctor that you have cancer?

Yes ☐ No ☐  
1 2

If **No**, go to **Question 62**

If **Yes**,

60) In what year was your cancer first diagnosed?

61) What sort of cancer is it?

.....

## H pylori

62) Have you ever been treated for a stomach bug (*H Pylori*) that required antibiotics and anti-ulcer drugs? (e.g Losec)

Yes ☐ No ☐  
1 2

If **No**, go to **Question 65**

If **Yes**,

63) In what year were you tested?

64) What treatment did you receive?

.....

## DYSPEZIA

65) Have you ever been told by a doctor that you have heartburn (a burning pain behind the breastbone)? (this is also known as dyspepsia)

Yes ☐ No ☐  
1 2

If **No**, go to **Question 67**

If **Yes**,

66) In what year was your heartburn first diagnosed?

## MEDICATION

**67)** Have you ever been treated with the following medications:

H2 blockers (reduce the amount of acid produced by the stomach e.g Tagamet, Zantac, Pepcid)

Yes <sub>1</sub> ☐ No <sub>2</sub> ☐

How long were you treated for:

From

To

Proton pump inhibitors (reduce the amount of acid produced by the stomach e.g Aciphex, Nexium, Prevacid, Prilosec)

Yes <sub>1</sub> ☐ No <sub>2</sub> ☐

How long were you treated for:

From

To

**NOTE THIS SECTION IS INCLUDED IN THE QUESTIONNAIRE FOR CASES ONLY**

We realise that you have recently been diagnosed with cancer, and would like to know more about what treatment you have received. Please complete the following questions, which will be treated with utmost confidentiality.

**68)** How was your stomach cancer detected?.

Through symptoms

3

Through GP

4

Other *please specify*

5

.....

**69)** In relation to your stomach cancer, when did you first notice signs or symptoms? *Give month and year, eg 08/2001*

Month

Year

**70)** When did you visit your GP regarding symptoms? *Give month and year, eg 08/2001*

Month

Year

**71)** After visiting your GP how long did you have to wait before your first appointment with a hospital doctor/specialist?

1

Same or next day

2

More than 2 days – 1 week

3

More than 1 week – 2 weeks

4

More than 2 weeks – 1 month

5

More than 1 month – 3 months

**72)** When did you first see a hospital doctor/specialist? *Give month and year, eg 08/2001*

Month

Year

**73)** Were you told what was wrong with you during this first hospital/specialist appointment, or was it before or after this first hospital/specialist appointment?

Before 1<sup>st</sup> appointment

1

At 1<sup>st</sup> appointment

2

After 1<sup>st</sup> appointment

3

**74)** If you were told after this appointment, then how long after?  
*(If you were told at this appointment or before, please go to Question 75)*

1 day – 2 weeks <sub>1</sub>      More than 2 weeks – 1 month <sub>2</sub>      More than 1 month – 3 months <sub>3</sub>

More than 3-Months – 6 months <sub>4</sub>      More than 6 months <sub>5</sub>      Not been told <sub>6</sub>

**75)** In relation to your stomach cancer care, has the hospital or clinic changed any of your appointments?      Yes <sub>1</sub>      No <sub>2</sub>

If so, how many?

**76)** In relation to your stomach cancer care have you ever had to miss any appointments?      Yes <sub>1</sub>      No <sub>2</sub>

*Specify circumstances:*

.....  
 .....

**77)** What treatment did you receive?  
**Do not worry if you do not know**

|                          |                                       |                                      |                                              |
|--------------------------|---------------------------------------|--------------------------------------|----------------------------------------------|
| i) Radiotherapy (X-rays) | Yes <input type="text"/> <sub>1</sub> | No <input type="text"/> <sub>2</sub> | Don't know <input type="text"/> <sub>3</sub> |
| ii) Chemotherapy         | Yes <input type="text"/> <sub>1</sub> | No <input type="text"/> <sub>2</sub> | Don't know <input type="text"/> <sub>3</sub> |
| iii) Surgery             | Yes <input type="text"/> <sub>1</sub> | No <input type="text"/> <sub>2</sub> | Don't know <input type="text"/> <sub>3</sub> |

**78)** Where did you have your treatment?

.....



**We would like to get further information about your treatment.**

**79)** Can we ask your doctor(s) for copies of your medical records relating to your stomach cancer?

Yes ☐ No ☐  
1 2

**Please note that if you answered NO to the above question, we will not approach your doctors.**

\*\*\*\*\*

Thank you very much for taking the time to complete this questionnaire. Your help assists us enormously in our research.

We will send you a copy of the study results when the research is completed.

Name:.....

Address: .....

.....

We may wish to involve you in further studies in the future. Please indicate your preference below regarding this.

**Yes**, I am happy to be contacted for future research

☐

**OR**

**No**, I do not want to be contacted for future research

☐
